# Supplementary material for: Consequences of seafood mislabeling for marine populations and fisheries management
Source: PubMed Central journal article supplement — Proc Natl Acad Sci U S A. 2020 Nov 16;117(48):30318–23. doi: 10.1073/pnas.2003741117 (PMC7720233; doi:10.1073/pnas.2003741117), 2020-11-16
Supplement: pnas.2003741117.sapp.pdf [file pnas.2003741117.sapp.pdf]

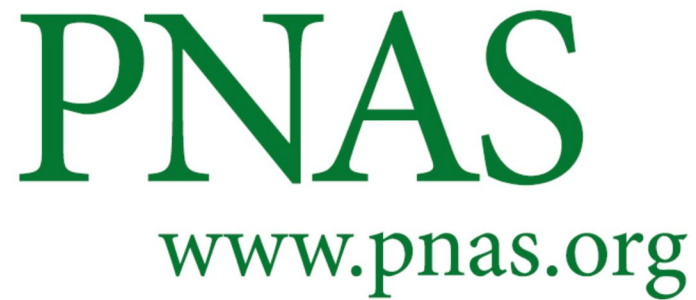

Supplementary Information for:

Consequences of Seafood Mislabeling for Marine Populations and Fisheries Management

Kailin Kroetz, Gloria M. Luque, Jessica A. Gephart, Sunny L. Jardine, Patrick Lee, Katrina Chicojay Moore,  
Cassandra Cole, Andrew Steinkruger, C. Josh Donlan

Corresponding author: Kailin Kroetz

Email: [kailin.kroetz@asu.edu](mailto:kailin.kroetz@asu.edu)

**This PDF file includes:**

Supplementary text  
Figures SI-1 to SI-4  
Tables SI-1 to SI-7  
SI References

## Supplementary Information Text

### Linking Mislabeling Data to Apparent Consumption and Production-Method Data

We linked mislabeling data to U.S. apparent consumption estimates (and imports and aquaculture production), using scientific names of the FAO production products from Fishstat [1] and scientific names of mislabeling products that had been previously linked to Fishbase [2] and Sealifebase [3] by Luque and Donlan [4] (see below). In the remainder of the SI we refer to products in Fishstat as FAO production products. Apparent consumption estimation required linking the product group field in the trade data from the U.S. National Oceanic and Atmospheric Administration's National Marine Fisheries Service to FAO production products to calculate apparent consumption as the sum of production and imports minus exports of each product.<sup>1</sup> For most products, we were able to link on the scientific names. However, not all mislabeling data could be linked this way, and we were forced to make a number of assumptions to further clean and link the datasets, which are described below.

Some products in the mislabeling data are ambiguously labeled and consist of more than one species, such as *Pacific salmon*, *tuna*, *cod*, and *snapper*. We identify these products with an asterisk (\*) in Figure 1. In these cases, we manually identified linkages. Pacific salmon, for example, encompasses several species belonging to the genus *Oncorhynchus*. The Pacific salmon macro links to Pink, Chinook, Sockeye, Coho and Chum salmon. For some product labels using taxonomic ambiguous common names, assigning taxonomic resolution is more challenging. In these cases, we identified the closest matching NOAA trade product grouping (based on the product group field) and included all the FAO production products linked to the trade product grouping in order to link it with mislabeling data. We then calculated 2016 total apparent consumption, total imports, and total aquaculture for each of these associated FAO production products. For example, for mislabeling data for *grouper*, we included all of the FAO production products that were previously linked to the NOAA trade product grouping for *grouper*. See Luque and Donlan [4] for more detail on data collection and naming for mislabeling data.

While mislabeling data for most products could be directly linked to an FAO production product name with positive 2016 estimated U.S. apparent consumption and known production method, this was not true for all products. In order to estimate the amount of an FAO production product produced via aquaculture or wild-caught and imported by the U.S., there must be corresponding NOAA trade product import data from at least one producing country with production method information (wild-caught or aquaculture) in 2016. In cases where import data was not available for at least one producer country, a 2016 apparent consumption estimate, import percentage, and aquaculture percentage for the FAO production product was not calculated in the prior steps.

For these cases of *missing* products, we used an alternative method to estimate apparent consumption and production. We took NOAA trade product groupings and calculated the percent of total 2016 global production for the grouping that could be attributed to each FAO production product produced via aquaculture or wild-caught and that had been linked to the grouping, excluding products associated with *nei*. The terms *nei* denotes FAO production *not explicitly identified* and can include multiple species, genera, or families under a single product name (e.g., *Groupers nei*, *Salmonids nei*, and *Snappers nei*). For each NOAA trade product grouping, we identified all linked *nei* FAO production products and summed the 2016 apparent consumption estimates. We used the total apparent consumption estimates for these *nei* products as a baseline to infer the amount of consumption that can be attributed to related *missing* products. We took 2016 global production percentages for *missing* products and multiplied these percentages by their respective NOAA trade product grouping's total *nei* consumption, allowing us to estimate how much of total *nei* product consumption in a grouping can be attributed to related *missing* products (and their known production methods).

We estimated global production for 19 expected and 36 substitute products using these alternative methods (i.e., approximately 72,000 and 10,300 tonnes of apparent consumption, respectively).

### Seafood Watch Scores

Seafood Watch assessments measure the population and management status of specific fisheries and aquaculture operations. We used scores for four factors from their assessments: impacts on species under assessment (i.e., target species), impacts on other species under assessment (i.e., bycatch), management effectiveness, and impacts on habitat and ecosystems. Ratings and recommendations for wild-capture fisheries are given for a single stock or product within a specific fishery, and each fishery is defined by region, gear type, and management body [5]. Each

---

<sup>1</sup> Trade data records with product groups without enough product information, such as caviar, fillet, tuna in airtight containers, and canned salmon, were dropped.

of these four scores, and the criteria that determine them, are briefly described below based on Monterey Bay Aquarium Seafood Watch [5].

*Impacts on the Target Species* is based on the Seafood Watch *species under assessment* score, which is based on two primary criteria. The first criterion assesses the current stock abundance, and the goal of maintaining it at a level that does not impair recruitment or productivity. The second criterion assesses fishing mortality, which must be appropriate for the current stock status which is defined at or below maximum sustainable yield.

*Impacts on Other Species* is based on the same two criteria from *Impacts on the Target Species* but applied to bycatch species that are caught within the same fishery. Additional considerations are taken for unknown bycatch. A third criterion, discards and bait use, is also included in the assessment. This criterion focuses on minimizing post-harvest loss and efficient bait use. Waste associated with high discards and bait use reduce the score.

*Management Effectiveness* is assessed according to five criteria. First, strategy and implementation considers whether a fisheries' management strategy has a high chance of preventing stock declines. Second, bycatch strategy assesses how management prevents negative impacts on species susceptible to bycatch. Third, scientific research and monitoring assesses whether managers use independent, robust, peer-reviewed, and up-to-date science, as well as appropriate monitoring of non-target species. Fourth, enforcement of management regulations assesses whether a fishery has appropriate permits, regulations, and requirements, along with the capacity to ensure and report compliance. Last, stakeholder inclusion assesses if there is transparency in the management process and stakeholder input.

*Impacts on Habitat and Ecosystems* is based on three criteria. The first considers the physical impact of fishing gear on habitat and substrate, with the goal of having no adverse impacts. The second criterion assesses the mitigation of gear impacts or the mitigation of damage to seafloor through habitat protection. Only gear that contacts the seafloor is considered. Mitigation efforts increase the score. The last criterion assesses the use of ecosystem-based fisheries management such that stocks are maintained at levels that promote a functioning ecosystem and food web.

The score reports can vary in their specificity. Some reports target an entire product, regardless of the origin of production, and are meant to have a global scope. Many reports are specific to a particular fishery or aquaculture operation, using a specific type of gear, and located in a specific country or region. The Seafood Watch scores are linked to the mislabeling and mislabeled apparent consumption data using either the production product name and country name, the production product name and FAO region, or simply the production product name.

In cases where Seafood Watch scores were available by country or FAO region and U.S. apparent consumption was from multiple assessed units, we calculated a weighted average score for each product. Specifically, we weighted the Seafood Watch scores for each assessed unit by the estimated U.S. apparent consumption associated with each assessed unit.

Finally, when the mislabeling product was a macro and consisted of multiple FAO production product names, we used another weighting process. Here we calculated a weighted average score where the weight was the apparent consumption associated with each product.

### Mislabeling Substitution Rate Calculations

*Data.* Data was compiled from a review of published literature up to December 2017, which resulted in 141 studies from peer-reviewed (117) and non-peer-reviewed (24) sources. The entire dataset consists of 27,313 samples, covering 401 products that have been tested. Data collection and filters are described in detail in Luque and Donlan 2019 [4]. In order to have sufficient data to estimate expected-substitute pair mislabeling rates and their uncertainty, we pooled samples across studies and used a global dataset. But for our primary analysis, we restricted the dataset to include only expected products that have been tested for mislabeling in the U.S. Thus, data used to estimate expected-substitute pair mislabeling rates included 246 pairs with  $\geq 50$  total samples and where the expected product had been tested in the U.S. at least once. The mean expected-substitute pair sample size was 533 (range: 51-2,528; median=219; mode=1,007). Central tendency estimates (i.e., posterior mean, median, and mode), HDIs, and sample size for each expected-substitute product pair are shown in Table SI-1.

*Meta-Analysis Model.* The hierarchical model is represented in Figure SI-2, which illustrates the parameter definitions, as well as the relationships between the parameters and the data. Starting with the data ( $y_i$ ), the likelihood function is described as

$$y_i | \theta_i \sim \text{Bin}(\theta_i, N_i)$$

where,  $y_i$  represents the number of an expected product that have been identified as a certain substitute species  $i$  out of  $N_i$  (i.e., total # tested samples of the expected product).  $Y_i$  is assumed to be a random variable from a binomial distribution that is defined by its mean  $\theta_i$  and the number of samples ( $N_i$ ). There are as many  $\theta_i$  as product pairs,

which is a proportion and thus can only take values between 0 and 1. We transform the parameters  $\theta_i$  using a logistic transformation and use a  $t$  distribution as a conjugate prior of the likelihood function.<sup>2</sup> The transformation can be defined as

$$\alpha_i = \text{logit}(\theta_i).$$

The estimated  $\alpha_i$  are  $t$  distributed random values around the central tendency  $\mu$ . A  $t$  distribution is similar to a normal distribution with two parameters that control its mean  $\mu$  and its width  $\sigma$ . The  $t$  distribution has a third parameter that controls the heaviness of its tails, the normality parameter  $\nu$ , and describes any deviation from normality when there are outliers (i.e., data values that fall unusually far from a model's expected value). Thus, the  $t$  distribution is robust against outliers (i.e., robust logistic regression), and the parameters  $\alpha_i$  can be described as,

$$\alpha_i | \mu, \sigma, \nu \sim t(\mu, \sigma, \nu)$$

where the probability of  $\alpha_i$  given the three hyperparameters follows a  $t$  distribution described by the  $\mu$ ,  $\sigma$ , and  $\nu$  (Fig. SI-2). The three hyperparameters are described below.

**$\mu \sim \text{Norm}(\mathbf{M}_\mu, \mathbf{S}_\mu)$ .** The estimated overall mislabeling rate is denoted by  $\mu$ , which is the mean of a normal distribution that describes the spread of mislabeling rates of  $i$  pairs ( $\theta_i$ ). The mean  $\mu$  of the  $t$  distribution is estimated and given a normal prior. The prior on  $\mu$  can be whatever is an appropriate description of real prior knowledge. In our case prior knowledge is limited, and we use a non-informative prior that is described by the two parameters  $M_\mu$  and  $S_\mu$ . The prior should be broad on the scale of the transformed data. To establish a generic value, we consider two extreme probabilities near 0.001 and 0.999. The corresponding inverse-logistic values are -6.9 and +6.9, which have a standard deviation of 10. Therefore, a value of  $S=10$  represents a broad prior for the transformed data. Thus, we use a normal distribution with a center  $M_\mu=0$  and scale  $S_\mu=100$  as our non-informative prior. This is equivalent of distribution centered at 0.5 with data varying from 0 to 1 for non-transformed data, which is justified given the variability of mislabeling studies (see [4]). We also ran the model with prior of a center  $M_\mu=0$  and scale  $S_\mu=10$  to explore any differences in model results. Some argue that a mildly informative prior can improve model estimates [6]. Thus, we re-ran our model using a mildly informative prior with the goal of assessing any influence of our non-informative prior on the results. We used a normal distribution with the center in the naive mean of our data (i.e.,  $M_\mu=0.30$  which equals -0.85 on a logistic scale) and scale  $S_\mu=10$ . Model estimates and HDI intervals for the model did not change with all three models. Thus, the prior has little influence on the posterior distribution. Thus, we carried out the analyses with the non-informative prior.

**$\sigma \sim \text{Unif}(\mathbf{L}_\sigma, \mathbf{H}_\sigma)$ .** The hyper-parameter  $\sigma$  describes the precision of the mean (i.e., scale). The prior on  $\sigma$  can also be whatever is an appropriate description prior knowledge on the dispersion of the data. In our case, prior knowledge is limited, and we use a uniform distribution that is vague and noncommittal, allowing a broad range of values for the scale parameter  $\sigma$  that describes the spread of the normal distribution. We use a lower ( $L_\sigma = 0$ ) and higher value ( $H_\sigma = 100$ ), which allows the model to estimate a posterior distribution of  $\sigma$  according to the spread of mislabeling rates given by the data.

**$\nu \sim \text{Exp}(1/30)$ .** The normality hyper-parameter  $\nu$  is estimated and given a broad exponential prior. It can range from 1 to  $\infty$ . When  $\nu = 1$  the  $t$  distribution has very long tails, while when  $\nu$  approaches  $\infty$ , the  $t$  distribution becomes normal. Values of  $> \sim 30$  indicate a normal distribution, while values  $< \sim 30$  indicate a distribution with heavier tails than a normal distribution. Typically, one is not interested in the exact estimated value of  $\nu$ ; rather, in giving the model flexibility to use heavy tails if the data demand them.

**Model Performance and Diagnostics.** From the Bayesian model, we generated a Markov Chain Monte Carlo (MCMC) sample from the posterior distribution. We ran the model with three parallel chains for 1,000,000 iterations without thinning. The values from the MCMC sample of the posterior distribution must be representative from the true posterior distribution and the parameter estimates must be accurate and stable (i.e., the mean and HDI should not differ significantly when the model is re-run). We carried out a series of diagnostic tests in order to check whether the MCMC sample from the posterior distribution of the model is representative of the true posterior distribution and whether the estimates are accurate and stable.

**Representativeness.** First, we assessed whether the MCMC sample was a representative sample from the posterior distribution via visual examination. *Trace plots* reveal if all chains meander and overlap with each other, indicating they are representative of the posterior distribution (Fig. SI-3; [7]). They also allow for the assessment of convergence and the necessary so-called *burn-in* period (i.e., the number of steps that should be excluded from the MCMC sample). We used a *burn-in* rate of 1,000. *Density plots* are smoothed histograms of the parameter values

<sup>2</sup> We tested a binomial model with beta priors as opposed to logistic-transformed priors. However, the model performed poorly, resulting in issues with convergence and low effective sample sizes.

sampled by each chain, which provide another visual tool to assess overlap (Fig. SI-3). Second, we assess representativeness numerically with the Gelman-Rubin statistic, which is known as the *shrink factor*. We used the heuristic of a Gelman-Rubin statistic  $>1.1$  as a warning that the chains have potentially not converged adequately [7]. In our model, all estimates had a Gelman-Rubin statistic  $<1.1$  (Table SI-2).

**Accuracy.** First, we also assessed visually if MCMC samples were large enough for a stable and accurate numerical estimate of the prior distribution. *Autocorrelation plots* show the degree of autocorrelation between chains (Fig. SI-2; [7]). Second, we assess accuracy numerically with the Effective Sample Size (ESS), which divides the actual sample size by the amount of autocorrelation. We used a heuristic of a ESS  $<10,000$  as a warning that the sample size may not be sufficient with respect to accuracy [7]. In our model, all estimates had an ESS  $>10,000$  (Table SI-2). Last, we also use the Monte Carlo Standard Error (MCSE) as a numerical diagnostic of accuracy. The MCSE indicates the estimated standard deviation of the sample mean in the chain, on the scale of the parameter value. In particular, we use the MCSE to assess the accuracy of the posterior mean, using a heuristic of  $>5\%$  (i.e., % of the standard deviation) as a warning that sample size may not be sufficient with respect to accuracy [7, 8]. In all cases, MCSE was  $<5\%$  (Table SI-2).

**Posterior Predictive Check.** We also compared the data to the posterior predictions of the model by generating simulated data from the credible parameter values of the model and examining the quality of the simulated data. The simulated data resembled the actual data as it is shown for the central tendency  $\mu$  in Figure SI-4. This constitutes a form of posterior predictive check, by which we check whether the model appears to be a reasonable description of the data.

## Robustness Checks

*Results Using Alternative Datasets of Mislabeling Pairs.* We used our two alternative datasets to test the difference in imported percentages between the substitute and expected product, using the bootstrapping procedure described in the Materials and Methods. The first contains product pairs with  $\geq 50$  samples tested globally, but relaxes the assumption that the expected product must have been tested in the U.S. (Global  $\$50+$  pairs; 387 pairs). The second contains all pairs with 100 or more samples tested globally (Global  $\$100+$  pairs; 277 pairs). The results are presented in Table SI-4. We found that substitute products are more likely to be imported than the expected products that they replace, and that the average difference across all pairs is large in magnitude and statistically significant.

We also conducted the analysis of differences in Seafood Watch scores using the two alternative datasets. Table SI-5 and SI-6 shows the results of the test for proportion of substitute products with a higher score using the *Global 50+ pairs* and *Global 100+ pairs* datasets, respectively. Results are generally consistent with results from a primary dataset (*U.S. 50+ pairs*). All tests using bootstrapped distributions of the *Global 50+ pairs* dataset resulted in negative and significant differences in Seafood Watch scores. For the *Global 100+ pairs* dataset, all four differences were negative, with three being statistically significant.

*Seafood Watch Score and Import Percentage Analyses with Product Exclusion.* In the process of aggregating Seafood Watch scores, we discovered that some mislabeled products were missing scores for a large subset of the overall apparent consumption. For example, the product *hake\** contains all of the products in the genus *Merluccius*. However, the vast majority of the apparent consumption for *hake\** is derived from North Pacific Hake (*Merluccius productus*) for which there are no scores available. Another example is the product swordfish (*Xiphias gladius*) for which scores were not available for specific countries that export the product to the U.S. We also perform a test excluding tuna because the fields in the 2016 trade data from the U.S. National Oceanic and Atmospheric Administration's National Marine Fisheries Service we use to identify products – “product group” and “product group species” – do not provide information on the types tuna (e.g. albacore, yellowfin) for many imports in airtight containers. In all of these cases, we calculated the import percent difference and aggregated Seafood Watch scores as described previously. We then re-ran the same analyses, but iteratively excluding each one of these product groups. Our goal was to explore if our results are robust to missing scores. Table SI-7 shows the results, which are qualitatively similar and remain significant.

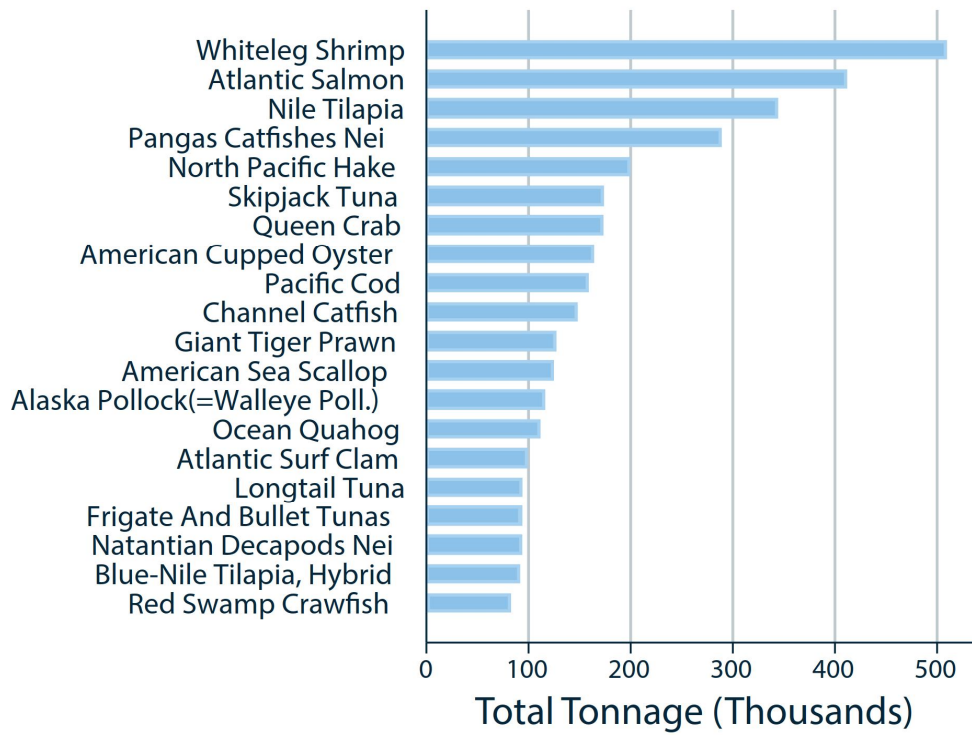

**Figure SI-1:** U.S. apparent consumption (2016 volume in live-weight equivalents): top 20 seafood products

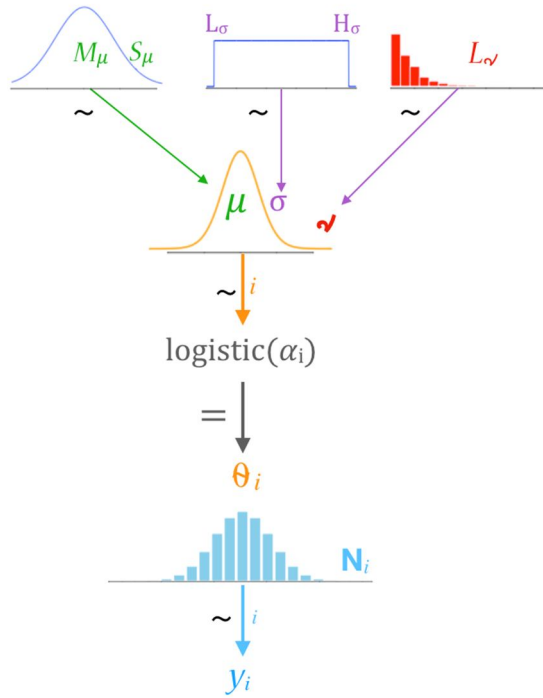

**Figure SI-2.** Robust logistic regression model with one level of hierarchy. Model schematic adopted from [7].

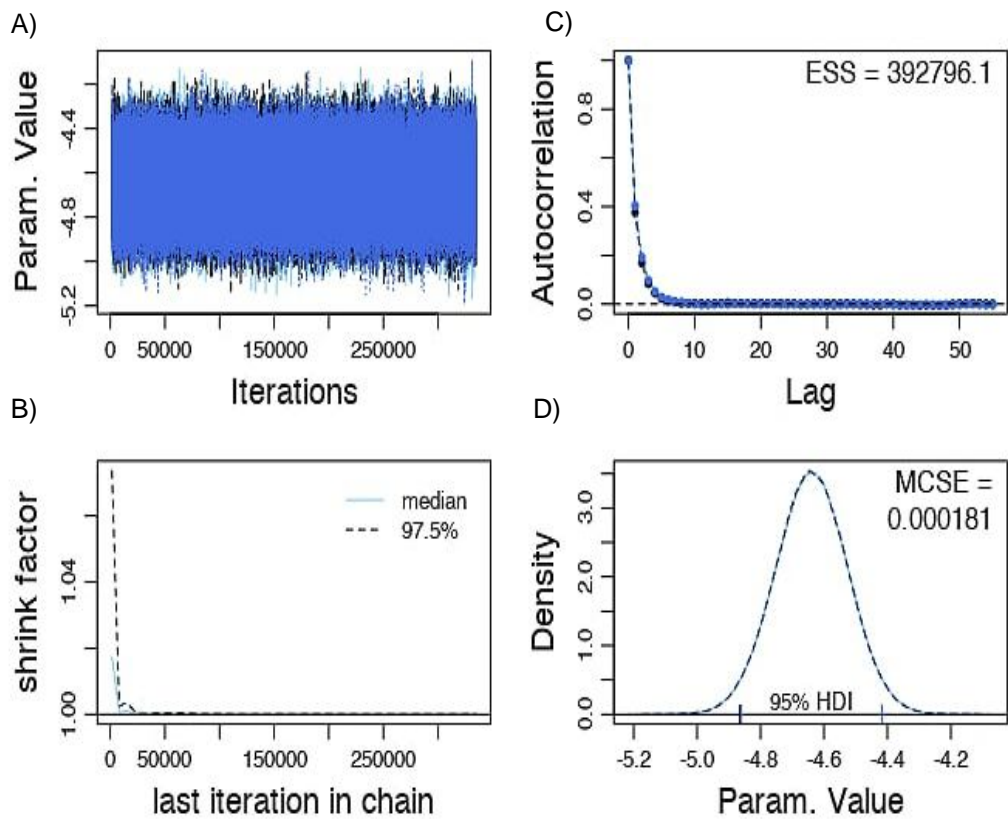

**Figure SI-3.** Visual diagnostics to assess the representativeness and accuracy of MCMC samples. A) Trace plots reveal if all chains meander and overlap with each other, indicating they are representative of the posterior distribution. B) The shrink factor informs if the chains have converged adequately. C) Autocorrelation plots show the degree of autocorrelation between chains, which informs Effective Sample Size. D) Density plot is a smoothed histogram of a parameter value sampled by each chain. We used the function *diagMCMC* from [7] to generate the visual diagnostics.



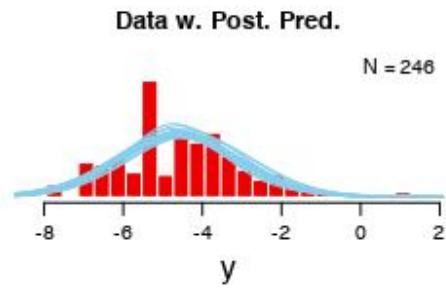

**Figure SI-4.** Histogram of the data (after the logistic transformation) superimposed with a smattering of  $t$ -distributed curves that have credible  $\mu$  and  $\sigma$  values from the MCMC sample of the posterior predicted distribution.

**Table SI-1.** Seafood mislabeling rate estimates for the expected-substitute pairs included in the meta-analysis. The posterior mean, median, and mode, along with the 95% HDI are shown. Total number of samples included in the meta-analysis for each pair is shown (n). The average 95% HDI interval for the 246 expected-substitute pair rates is 3%. Common names correspond to Fishbase [2] and Sealifebase [3]. Products with an \* represent more than one species.

| Expected              | Substitute                         | Posterior Mean | Posterior Median | Posterior Mode | Lower 95% HDI | Higher 95% HDI | n    |
|-----------------------|------------------------------------|----------------|------------------|----------------|---------------|----------------|------|
| Albacore              | <i>Katsuwonus pelamis</i>          | 3%             | 3%               | 2%             | <1%           | 6%             | 88   |
| Albacore              | <i>Lepidocybium flavobrunneum</i>  | 2%             | 2%               | 1%             | <1%           | 5%             | 88   |
| Albacore              | <i>Thunnus albacares</i>           | 3%             | 3%               | 2%             | <1%           | 6%             | 88   |
| Albacore              | <i>Thunnus obesus</i>              | 3%             | 3%               | 2%             | <1%           | 6%             | 88   |
| Albacore              | <i>Thunnus thynnus</i>             | 1%             | 1%               | <1%            | <1%           | 3%             | 88   |
| Amur sturgeon         | <i>Huso dauricus</i>               | 16%            | 16%              | 16%            | 11%           | 22%            | 151  |
| Anchovy*              | <i>Engraulis encrasicolus</i>      | 2%             | 2%               | 1%             | <1%           | 4%             | 91   |
| Angler*               | <i>Lophius litulon</i>             | 3%             | 3%               | 3%             | 1%            | 7%             | 128  |
| Angler*               | <i>Lophius vomerinus</i>           | 2%             | 2%               | 1%             | <1%           | 4%             | 128  |
| Angler*               | <i>Protonibea diacanthus</i>       | 1%             | 1%               | <1%            | <1%           | 2%             | 128  |
| Atlantic bluefin tuna | <i>Thunnus alalunga</i>            | 1%             | <1%              | <1%            | <1%           | 1%             | 243  |
| Atlantic bluefin tuna | <i>Thunnus albacares</i>           | 34%            | 34%              | 34%            | 28%           | 40%            | 243  |
| Atlantic bluefin tuna | <i>Thunnus atlanticus</i>          | 1%             | <1%              | <1%            | <1%           | 1%             | 243  |
| Atlantic bluefin tuna | <i>Thunnus obesus</i>              | 18%            | 18%              | 18%            | 14%           | 23%            | 243  |
| Atlantic cod          | <i>Brosme brosme</i>               | <1%            | <1%              | <1%            | <1%           | <1%            | 2143 |
| Atlantic cod          | <i>Gadus chalcogrammus</i>         | <1%            | <1%              | <1%            | <1%           | 1%             | 2143 |
| Atlantic cod          | <i>Gadus*cephalus</i>              | 1%             | 1%               | 1%             | 1%            | 2%             | 2143 |
| Atlantic cod          | <i>Melanogrammus aeglefinus</i>    | 2%             | 2%               | 2%             | 1%            | 2%             | 2143 |
| Atlantic cod          | <i>Merlangius merlangus</i>        | <1%            | <1%              | <1%            | <1%           | <1%            | 2143 |
| Atlantic cod          | <i>Merluccius nr</i>               | <1%            | <1%              | <1%            | <1%           | <1%            | 2143 |
| Atlantic cod          | <i>Molva dypterygia</i>            | <1%            | <1%              | <1%            | <1%           | <1%            | 2143 |
| Atlantic cod          | <i>Molva molva</i>                 | <1%            | <1%              | <1%            | <1%           | 1%             | 2143 |
| Atlantic cod          | <i>Pangasianodon hypophthalmus</i> | <1%            | <1%              | <1%            | <1%           | <1%            | 2143 |
| Atlantic cod          | <i>Perca flavescens</i>            | <1%            | <1%              | <1%            | <1%           | <1%            | 2143 |
| Atlantic cod          | <i>Pollachius pollachius</i>       | <1%            | <1%              | <1%            | <1%           | <1%            | 2143 |
| Atlantic cod          | <i>Pollachius virens</i>           | 1%             | 1%               | 1%             | <1%           | 1%             | 2143 |

| Expected        | Substitute                                     | Posterior Mean | Posterior Median | Posterior Mode | Lower 95% HDI | Higher 95% HDI | n    |
|-----------------|------------------------------------------------|----------------|------------------|----------------|---------------|----------------|------|
| Atlantic cod    | <i>Ruvettus pretiosus</i>                      | <1%            | <1%              | <1%            | <1%           | 1%             | 2143 |
| Atlantic salmon | <i>Oncorhynchus keta</i>                       | 1%             | 1%               | 1%             | <1%           | 2%             | 256  |
| Atlantic salmon | <i>Oncorhynchus mykiss</i>                     | 3%             | 2%               | 2%             | 1%            | 4%             | 256  |
| Atlantic salmon | <i>Oncorhynchus nerka</i>                      | 1%             | <1%              | <1%            | <1%           | 1%             | 256  |
| Atlantic salmon | <i>Salmo trutta</i>                            | 1%             | <1%              | <1%            | <1%           | 1%             | 256  |
| Barramundi      | <i>Lates niloticus</i>                         | 5%             | 4%               | 4%             | 1%            | 9%             | 93   |
| Barramundi      | <i>Lates nr</i>                                | 11%            | 10%              | 10%            | 5%            | 17%            | 93   |
| Barramundi      | <i>Seriolella brama</i>                        | 5%             | 4%               | 4%             | 1%            | 9%             | 93   |
| Beluga          | <i>Acipenser baerii</i>                        | 1%             | 1%               | 1%             | <1%           | 1%             | 701  |
| Beluga          | <i>Acipenser baerii x naccaraii x persicus</i> | <1%            | <1%              | <1%            | <1%           | 1%             | 701  |
| Beluga          | <i>Acipenser gueldenstaedtii</i>               | 3%             | 2%               | 2%             | 1%            | 4%             | 701  |
| Beluga          | <i>Acipenser gueldenstaedtii x naccaraii</i>   | <1%            | <1%              | <1%            | <1%           | 1%             | 701  |
| Beluga          | <i>Acipenser persicus</i>                      | <1%            | <1%              | <1%            | <1%           | 1%             | 701  |
| Beluga          | <i>Acipenser sinensis</i>                      | <1%            | <1%              | <1%            | <1%           | 1%             | 701  |
| Beluga          | <i>Acipenser stellatus</i>                     | 1%             | 1%               | 1%             | <1%           | 1%             | 701  |
| Beluga          | <i>Acipenser transmontanus</i>                 | <1%            | <1%              | <1%            | <1%           | 1%             | 701  |
| Beluga          | <i>Huso dauricus</i>                           | <1%            | <1%              | <1%            | <1%           | 1%             | 701  |
| Blue crab       | <i>Callinectes bellicosus</i>                  | 2%             | 2%               | 1%             | <1%           | 5%             | 90   |
| Blue crab       | <i>Charybdis nr</i>                            | 2%             | 2%               | 1%             | <1%           | 5%             | 90   |
| Blue crab       | <i>Portunus nr</i>                             | 4%             | 3%               | 3%             | 1%            | 8%             | 90   |
| Blue crab       | <i>Portunus pelagicus</i>                      | 23%            | 23%              | 22%            | 15%           | 32%            | 90   |
| Blue crab       | <i>Portunus pseudoargentatus</i>               | 2%             | 2%               | 1%             | <1%           | 5%             | 90   |
| Blue crab       | <i>Portunus sanguinolentus</i>                 | 2%             | 2%               | 1%             | <1%           | 5%             | 90   |
| Blue crab       | <i>Portunus trituberculatus</i>                | 2%             | 2%               | 1%             | <1%           | 5%             | 90   |
| Chinook salmon  | <i>Oncorhynchus keta</i>                       | 14%            | 14%              | 13%            | 7%            | 22%            | 70   |
| Chinook salmon  | <i>Oncorhynchus kisutch</i>                    | 2%             | 2%               | 1%             | <1%           | 6%             | 70   |
| Chinook salmon  | <i>Salmo salar</i>                             | 11%            | 11%              | 10%            | 5%            | 19%            | 70   |
| Cod*            | <i>Albatrossia pectoralis</i>                  | 1%             | 1%               | 1%             | <1%           | 1%             | 1007 |
| Cod*            | <i>Anarhichas minor</i>                        | <1%            | <1%              | <1%            | <1%           | <1%            | 1007 |

| Expected           | Substitute                          | Posterior Mean | Posterior Median | Posterior Mode | Lower 95% HDI | Higher 95% HDI | n    |
|--------------------|-------------------------------------|----------------|------------------|----------------|---------------|----------------|------|
| Cod*               | <i>Anoplopoma fimbria</i>           | <1%            | <1%              | <1%            | <1%           | <1%            | 1007 |
| Cod*               | <i>Argentina silus</i>              | 1%             | 1%               | 1%             | 1%            | 2%             | 1007 |
| Cod*               | <i>Atheresthes evermanni</i>        | <1%            | <1%              | <1%            | <1%           | <1%            | 1007 |
| Cod*               | <i>Atheresthes stomias</i>          | <1%            | <1%              | <1%            | <1%           | <1%            | 1007 |
| Cod*               | <i>Dissostichus eleginoides</i>     | <1%            | <1%              | <1%            | <1%           | <1%            | 1007 |
| Cod*               | <i>Gadus chalcogrammus</i>          | 2%             | 2%               | 2%             | 1%            | 2%             | 1007 |
| Cod*               | <i>Lagocephalus spadiceus</i>       | 1%             | 1%               | 1%             | <1%           | 1%             | 1007 |
| Cod*               | <i>Lagocephalus wheeleri</i>        | <1%            | <1%              | <1%            | <1%           | <1%            | 1007 |
| Cod*               | <i>Lates niloticus</i>              | <1%            | <1%              | <1%            | <1%           | <1%            | 1007 |
| Cod*               | <i>Macrourus carinatus</i>          | <1%            | <1%              | <1%            | <1%           | 1%             | 1007 |
| Cod*               | <i>Melanogrammus aeglefinus</i>     | 2%             | 2%               | 2%             | 1%            | 3%             | 1007 |
| Cod*               | <i>Merluccius angustimanus</i>      | <1%            | <1%              | <1%            | <1%           | 1%             | 1007 |
| Cod*               | <i>Merluccius capensis</i>          | <1%            | <1%              | <1%            | <1%           | <1%            | 1007 |
| Cod*               | <i>Merluccius hubbsi</i>            | 1%             | <1%              | <1%            | <1%           | 1%             | 1007 |
| Cod*               | <i>Merluccius merluccius</i>        | <1%            | <1%              | <1%            | <1%           | 1%             | 1007 |
| Cod*               | <i>Merluccius paradoxus</i>         | <1%            | <1%              | <1%            | <1%           | 1%             | 1007 |
| Cod*               | <i>Merluccius productus</i>         | <1%            | <1%              | <1%            | <1%           | 1%             | 1007 |
| Cod*               | <i>Micromesistius australis</i>     | <1%            | <1%              | <1%            | <1%           | 1%             | 1007 |
| Cod*               | <i>Molva dypterygia</i>             | <1%            | <1%              | <1%            | <1%           | <1%            | 1007 |
| Cod*               | <i>Molva molva</i>                  | 1%             | 1%               | 1%             | <1%           | 1%             | 1007 |
| Cod*               | <i>Oreochromis nr</i>               | <1%            | <1%              | <1%            | <1%           | 1%             | 1007 |
| Cod*               | <i>Pangasianodon hypophthalmus</i>  | 1%             | <1%              | <1%            | <1%           | 1%             | 1007 |
| Cod*               | <i>Pollachius pollachius</i>        | 1%             | 1%               | 1%             | 1%            | 2%             | 1007 |
| Cod*               | <i>Pollachius virens</i>            | 5%             | 5%               | 5%             | 4%            | 7%             | 1007 |
| Cod*               | <i>Reinhardtius hippoglossoides</i> | 1%             | 1%               | 1%             | 1%            | 2%             | 1007 |
| Cod*               | <i>Ruvettus pretiosus</i>           | 1%             | 1%               | 1%             | <1%           | 1%             | 1007 |
| Common dolphinfish | <i>Argyrozona argyrozona</i>        | 2%             | 1%               | 1%             | <1%           | 4%             | 59   |
| Common dolphinfish | <i>Brachyplatystoma platynemum</i>  | 2%             | 1%               | 1%             | <1%           | 4%             | 59   |
| Common dolphinfish | <i>Seriola lalandi</i>              | 7%             | 7%               | 6%             | 2%            | 13%            | 59   |

| Expected              | Substitute                                     | Posterior Mean | Posterior Median | Posterior Mode | Lower 95% HDI | Higher 95% HDI | n    |
|-----------------------|------------------------------------------------|----------------|------------------|----------------|---------------|----------------|------|
| Danube sturgeon       | <i>Acipenser baerii</i>                        | <1%            | <1%              | <1%            | <1%           | <1%            | 2528 |
| Danube sturgeon       | <i>Acipenser baerii x naccaraii x persicus</i> | <1%            | <1%              | <1%            | <1%           | <1%            | 2528 |
| Danube sturgeon       | <i>Acipenser nudiventris</i>                   | <1%            | <1%              | <1%            | <1%           | 1%             | 2528 |
| Danube sturgeon       | <i>Acipenser persicus</i>                      | <1%            | <1%              | <1%            | <1%           | <1%            | 2528 |
| Danube sturgeon       | <i>Acipenser schrenckii</i>                    | <1%            | <1%              | <1%            | <1%           | 1%             | 2528 |
| Danube sturgeon       | <i>Acipenser stellatus</i>                     | 1%             | 1%               | 1%             | 1%            | 1%             | 2528 |
| Danube sturgeon       | <i>Acipenser transmontanus</i>                 | <1%            | <1%              | <1%            | <1%           | <1%            | 2528 |
| Danube sturgeon       | <i>Huso dauricus</i>                           | <1%            | <1%              | <1%            | <1%           | <1%            | 2528 |
| Danube sturgeon       | <i>Huso huso</i>                               | 2%             | 2%               | 2%             | 1%            | 2%             | 2528 |
| Flounder*             | <i>Atheresthes stomias</i>                     | 7%             | 7%               | 6%             | 2%            | 14%            | 56   |
| Flounder*             | <i>Cynoscion guatucupa</i>                     | 3%             | 2%               | 2%             | <1%           | 7%             | 56   |
| Flounder*             | <i>Isopisthus parvipinnis</i>                  | 2%             | 1%               | 1%             | <1%           | 4%             | 56   |
| Flounder*             | <i>Micropogonias furnieri</i>                  | 3%             | 2%               | 2%             | <1%           | 7%             | 56   |
| Flounder*             | <i>Pangasianodon hypophthalmus</i>             | 2%             | 1%               | 1%             | <1%           | 4%             | 56   |
| Flounder*             | <i>Pangasianodon nr</i>                        | 2%             | 1%               | 1%             | <1%           | 4%             | 56   |
| Flounder*             | <i>Paralichthys patagonicus</i>                | 3%             | 2%               | 1%             | <1%           | 7%             | 56   |
| Fringebarbel sturgeon | <i>Acipenser stellatus</i>                     | 8%             | 8%               | 7%             | 2%            | 15%            | 64   |
| Fringebarbel sturgeon | <i>Huso huso</i>                               | 4%             | 3%               | 2%             | 1%            | 8%             | 64   |
| Grouper*              | <i>Acanthistius brasiliensis</i>               | 1%             | 1%               | <1%            | <1%           | 2%             | 189  |
| Grouper*              | <i>Aprion virescens</i>                        | 2%             | 2%               | 2%             | 1%            | 5%             | 189  |
| Grouper*              | <i>Brotula barbata</i>                         | 2%             | 2%               | 1%             | <1%           | 4%             | 189  |
| Grouper*              | <i>Caulolatilus nr</i>                         | 1%             | 1%               | <1%            | <1%           | 2%             | 189  |
| Grouper*              | <i>Chelidonichthys capensis</i>                | 1%             | 1%               | <1%            | <1%           | 2%             | 189  |
| Grouper*              | <i>Cynoscion albus</i>                         | 1%             | 1%               | <1%            | <1%           | 2%             | 189  |
| Grouper*              | <i>Cynoscion guatucupa</i>                     | 1%             | 1%               | <1%            | <1%           | 2%             | 189  |
| Grouper*              | <i>Cynoscion virescens</i>                     | 2%             | 2%               | 1%             | <1%           | 4%             | 189  |
| Grouper*              | <i>Gadus chalcogrammus</i>                     | 1%             | 1%               | <1%            | <1%           | 2%             | 189  |
| Grouper*              | <i>Hyporthodus nr</i>                          | 1%             | 1%               | <1%            | <1%           | 2%             | 189  |
| Grouper*              | <i>Lobotes surinamensis</i>                    | 1%             | 1%               | <1%            | <1%           | 2%             | 189  |

| Expected             | Substitute                         | Posterior Mean | Posterior Median | Posterior Mode | Lower 95% HDI | Higher 95% HDI | n   |
|----------------------|------------------------------------|----------------|------------------|----------------|---------------|----------------|-----|
| Grouper*             | <i>Merluccius merluccius</i>       | 1%             | 1%               | <1%            | <1%           | 2%             | 189 |
| Grouper*             | <i>Micropogonias furnieri</i>      | 1%             | 1%               | <1%            | <1%           | 2%             | 189 |
| Grouper*             | <i>Oreochromis niloticus</i>       | 1%             | 1%               | <1%            | <1%           | 2%             | 189 |
| Grouper*             | <i>Oreochromis nr</i>              | 1%             | 1%               | <1%            | <1%           | 2%             | 189 |
| Grouper*             | <i>Pangasianodon hypophthalmus</i> | 2%             | 2%               | 2%             | 1%            | 5%             | 189 |
| Grouper*             | <i>Pangasius bocourti</i>          | 1%             | 1%               | 1%             | <1%           | 2%             | 189 |
| Grouper*             | <i>Scarus nr</i>                   | 1%             | 1%               | <1%            | <1%           | 2%             | 189 |
| Grouper*             | <i>Scomberomorus cavalla</i>       | 1%             | 1%               | <1%            | <1%           | 2%             | 189 |
| Haddock              | <i>Gadus*cephalus</i>              | <1%            | <1%              | <1%            | <1%           | 1%             | 626 |
| Haddock              | <i>Gadus morhua</i>                | 3%             | 3%               | 3%             | 1%            | 4%             | 626 |
| Haddock              | <i>Gadus nr</i>                    | <1%            | <1%              | <1%            | <1%           | 1%             | 626 |
| Haddock              | <i>Lepidocybium flavobrunneum</i>  | <1%            | <1%              | <1%            | <1%           | 1%             | 626 |
| Haddock              | <i>Merlangius merlangus</i>        | 1%             | <1%              | <1%            | <1%           | 1%             | 626 |
| Haddock              | <i>Pollachius pollachius</i>       | <1%            | <1%              | <1%            | <1%           | 1%             | 626 |
| Haddock              | <i>Pollachius virens</i>           | 1%             | <1%              | <1%            | <1%           | 1%             | 626 |
| Humphead snapper     | <i>Lutjanus erythropterus</i>      | 22%            | 21%              | 21%            | 12%           | 33%            | 54  |
| Humphead snapper     | <i>Lutjanus malabaricus</i>        | 51%            | 51%              | 51%            | 38%           | 64%            | 54  |
| Humphead snapper     | <i>Lutjanus nr</i>                 | 2%             | 1%               | 1%             | <1%           | 5%             | 54  |
| Humphead snapper     | <i>Lutjanus sebae</i>              | 2%             | 1%               | 1%             | <1%           | 5%             | 54  |
| Kaluga               | <i>Acipenser gueldenstaedtii</i>   | 1%             | <1%              | <1%            | <1%           | 1%             | 237 |
| Kaluga               | <i>Acipenser schrenckii</i>        | 11%            | 10%              | 10%            | 7%            | 15%            | 237 |
| Northern red snapper | <i>Gadus morhua</i>                | 1%             | <1%              | <1%            | <1%           | 2%             | 219 |
| Northern red snapper | <i>Lates niloticus</i>             | 1%             | <1%              | <1%            | <1%           | 2%             | 219 |
| Northern red snapper | <i>Lutjanus analis</i>             | 1%             | 1%               | 1%             | <1%           | 3%             | 219 |
| Northern red snapper | <i>Lutjanus erythropterus</i>      | 1%             | 1%               | 1%             | <1%           | 2%             | 219 |
| Northern red snapper | <i>Lutjanus griseus</i>            | 3%             | 3%               | 3%             | 1%            | 5%             | 219 |
| Northern red snapper | <i>Lutjanus malabaricus</i>        | 2%             | 2%               | 1%             | <1%           | 3%             | 219 |
| Northern red snapper | <i>Lutjanus novemfasiatus</i>      | 1%             | <1%              | <1%            | <1%           | 2%             | 219 |
| Northern red snapper | <i>Lutjanus sanguineus</i>         | 12%            | 12%              | 12%            | 8%            | 17%            | 219 |

| Expected             | Substitute                         | Posterior Mean | Posterior Median | Posterior Mode | Lower 95% HDI | Higher 95% HDI | n   |
|----------------------|------------------------------------|----------------|------------------|----------------|---------------|----------------|-----|
| Northern red snapper | <i>Lutjanus synagris</i>           | 6%             | 6%               | 6%             | 3%            | 10%            | 219 |
| Northern red snapper | <i>Lutjanus vivanus</i>            | 1%             | <1%              | <1%            | <1%           | 2%             | 219 |
| Northern red snapper | <i>Ocyurus chrysurus</i>           | 1%             | 1%               | 1%             | <1%           | 2%             | 219 |
| Northern red snapper | <i>Oreochromis nr</i>              | 7%             | 7%               | 7%             | 4%            | 11%            | 219 |
| Northern red snapper | <i>Pagrus major</i>                | 5%             | 5%               | 5%             | 3%            | 8%             | 219 |
| Northern red snapper | <i>Pangasianodon hypophthalmus</i> | 1%             | <1%              | <1%            | <1%           | 1%             | 219 |
| Northern red snapper | <i>Pinjalo lewisi</i>              | 1%             | <1%              | <1%            | <1%           | 1%             | 219 |
| Northern red snapper | <i>Pristipomoides sieboldii</i>    | 1%             | 1%               | 1%             | <1%           | 2%             | 219 |
| Northern red snapper | <i>Rhomboplites aurorubens</i>     | 2%             | 2%               | 2%             | 1%            | 4%             | 219 |
| Northern red snapper | <i>Sebastes fasciatus</i>          | 1%             | 1%               | 1%             | <1%           | 2%             | 219 |
| Northern red snapper | <i>Sebastes nr</i>                 | 1%             | 1%               | 1%             | <1%           | 2%             | 219 |
| Pacific bluefin tuna | <i>Thunnus albacares</i>           | 68%            | 68%              | 68%            | 56%           | 79%            | 61  |
| Pacific bluefin tuna | <i>Thunnus obesus</i>              | 19%            | 19%              | 18%            | 10%           | 29%            | 61  |
| Pacific bluefin tuna | <i>Xiphias gladius</i>             | 2%             | 1%               | 1%             | <1%           | 4%             | 61  |
| Pacific cod          | <i>Gadus morhua</i>                | 6%             | 6%               | 5%             | 3%            | 10%            | 169 |
| Pacific cod          | <i>Liparis nr</i>                  | 2%             | 1%               | 1%             | <1%           | 3%             | 169 |
| Pacific cod          | <i>Melanogrammus aeglefinus</i>    | 1%             | 1%               | 1%             | <1%           | 3%             | 169 |
| Pacific salmon*      | <i>Oncorhynchus mykiss</i>         | 1%             | <1%              | <1%            | <1%           | 1%             | 235 |
| Pacific salmon*      | <i>Salmo salar</i>                 | 26%            | 26%              | 25%            | 20%           | 32%            | 235 |
| Pacific snapper*     | <i>Oreochromis nr</i>              | 8%             | 8%               | 7%             | 3%            | 14%            | 77  |
| Salmon*              | <i>Cynoscion guatucupa</i>         | 1%             | 1%               | 1%             | <1%           | 2%             | 204 |
| Salmon*              | <i>Micropogonias furnieri</i>      | 1%             | 1%               | <1%            | <1%           | 2%             | 204 |
| Salmon*              | <i>Oncorhynchus mykiss</i>         | 1%             | 1%               | 1%             | <1%           | 2%             | 204 |
| Salmon*              | <i>Prionace glauca</i>             | 1%             | 1%               | <1%            | <1%           | 2%             | 204 |
| Salmon*              | <i>Salmo trutta</i>                | 1%             | 1%               | <1%            | <1%           | 2%             | 204 |
| Salmon*              | <i>Seriola zonata</i>              | 1%             | 1%               | <1%            | <1%           | 2%             | 204 |
| Salmon*              | <i>Thunnus alalunga</i>            | 1%             | 1%               | <1%            | <1%           | 2%             | 204 |
| Sardine*             | <i>Brevoortia aurea</i>            | 19%            | 18%              | 18%            | 13%           | 24%            | 193 |
| Sardine*             | <i>Centengraulis edentulus</i>     | 5%             | 5%               | 5%             | 2%            | 8%             | 193 |

| Expected | Substitute                       | Posterior Mean | Posterior Median | Posterior Mode | Lower 95% HDI | Higher 95% HDI | n   |
|----------|----------------------------------|----------------|------------------|----------------|---------------|----------------|-----|
| Sardine* | <i>Clupea harengus</i>           | 4%             | 4%               | 3%             | 1%            | 7%             | 193 |
| Sardine* | <i>Rastrelliger faughni</i>      | 1%             | 1%               | <1%            | <1%           | 2%             | 193 |
| Sardine* | <i>Scomber japonicus</i>         | 6%             | 6%               | 6%             | 3%            | 10%            | 193 |
| Sardine* | <i>Trachurus lathami</i>         | 1%             | 1%               | <1%            | <1%           | 2%             | 193 |
| Seabass* | <i>Lateolabrax japonicus</i>     | 3%             | 3%               | 2%             | <1%           | 7%             | 51  |
| Seabass* | <i>Morone chrysops</i>           | 2%             | 1%               | 1%             | <1%           | 5%             | 51  |
| Seabass* | <i>Morone saxatilis</i>          | 2%             | 1%               | 1%             | <1%           | 5%             | 51  |
| Seabass* | <i>Oreochromis niloticus</i>     | 2%             | 1%               | 1%             | <1%           | 5%             | 51  |
| Seabass* | <i>Pagrus major</i>              | 3%             | 3%               | 2%             | <1%           | 7%             | 51  |
| Seabass* | <i>Paralichthys dentatus</i>     | 2%             | 1%               | 1%             | <1%           | 5%             | 51  |
| Seabass* | <i>Sciaenops ocellatus</i>       | 2%             | 1%               | 1%             | <1%           | 5%             | 51  |
| Seabass* | <i>Sparus aurata</i>             | 3%             | 3%               | 2%             | <1%           | 7%             | 51  |
| Shrimp*  | <i>Litopenaeus vannamei</i>      | 1%             | 1%               | <1%            | <1%           | 3%             | 85  |
| Shrimp*  | <i>Pleoticus robustus</i>        | 3%             | 3%               | 2%             | <1%           | 6%             | 85  |
| Snapper* | <i>Lutjanus argentimaculatus</i> | 2%             | 2%               | 2%             | <1%           | 5%             | 114 |
| Snapper* | <i>Lutjanus kasmira</i>          | 1%             | 1%               | <1%            | <1%           | 3%             | 114 |
| Snapper* | <i>Lutjanus sanguineus</i>       | 1%             | 1%               | <1%            | <1%           | 3%             | 114 |
| Snapper* | <i>Oreochromis aureus</i>        | 2%             | 1%               | 1%             | <1%           | 4%             | 114 |
| Snapper* | <i>Oreochromis mossambicus</i>   | 2%             | 1%               | 1%             | <1%           | 4%             | 114 |
| Snapper* | <i>Oreochromis niloticus</i>     | 12%            | 12%              | 12%            | 7%            | 18%            | 114 |
| Snapper* | <i>Oreochromis nr</i>            | 6%             | 5%               | 5%             | 2%            | 10%            | 114 |
| Snapper* | <i>Oreochromis urolepis</i>      | 1%             | 1%               | <1%            | <1%           | 3%             | 114 |
| Snapper* | <i>Pagrus major</i>              | 1%             | 1%               | <1%            | <1%           | 3%             | 114 |
| Snapper* | <i>Sebastes alutus</i>           | 2%             | 1%               | 1%             | <1%           | 4%             | 114 |
| Snapper* | <i>Sebastes babcocki</i>         | 1%             | 1%               | <1%            | <1%           | 3%             | 114 |
| Snapper* | <i>Sebastes entomelas</i>        | 2%             | 2%               | 2%             | <1%           | 5%             | 114 |
| Snapper* | <i>Sebastes flavidus</i>         | 3%             | 3%               | 2%             | 1%            | 6%             | 114 |
| Snapper* | <i>Seriola quinqueradiata</i>    | 1%             | 1%               | <1%            | <1%           | 3%             | 114 |
| Snapper* | <i>Sparus aurata</i>             | 1%             | 1%               | <1%            | <1%           | 3%             | 114 |



| Expected        | Substitute                                     | Posterior Mean | Posterior Median | Posterior Mode | Lower 95% HDI | Higher 95% HDI | n    |
|-----------------|------------------------------------------------|----------------|------------------|----------------|---------------|----------------|------|
| Sockeye salmon  | <i>Oncorhynchus kisutch</i>                    | 2%             | 2%               | 1%             | <1%           | 4%             | 92   |
| Squid*          | <i>Doryteuthis gahi</i>                        | 4%             | 3%               | 3%             | 1%            | 8%             | 91   |
| Squid*          | <i>Lagocephalus spadiceus</i>                  | 6%             | 5%               | 5%             | 2%            | 10%            | 91   |
| Squid*          | <i>Sepia pharaonis</i>                         | 10%            | 10%              | 9%             | 4%            | 16%            | 91   |
| Squid*          | <i>Upeneus japonicus</i>                       | 2%             | 2%               | 1%             | <1%           | 5%             | 91   |
| Squid*          | <i>Uroteuthis duvaucelii</i>                   | 5%             | 4%               | 4%             | 1%            | 9%             | 91   |
| Starry sturgeon | <i>Acipenser baerii</i>                        | <1%            | <1%              | <1%            | <1%           | 1%             | 1183 |
| Starry sturgeon | <i>Acipenser baerii x naccaraii x persicus</i> | <1%            | <1%              | <1%            | <1%           | <1%            | 1183 |
| Starry sturgeon | <i>Acipenser gueldenstaedtii</i>               | 1%             | 1%               | 1%             | 1%            | 2%             | 1183 |
| Starry sturgeon | <i>Acipenser gueldenstaedtii x naccarii</i>    | <1%            | <1%              | <1%            | <1%           | <1%            | 1183 |
| Starry sturgeon | <i>Acipenser nudiventris</i>                   | 4%             | 4%               | 4%             | 3%            | 5%             | 1183 |
| Starry sturgeon | <i>Acipenser persicus</i>                      | <1%            | <1%              | <1%            | <1%           | <1%            | 1183 |
| Starry sturgeon | <i>Acipenser ruthenus</i>                      | <1%            | <1%              | <1%            | <1%           | <1%            | 1183 |
| Starry sturgeon | <i>Huso dauricus</i>                           | <1%            | <1%              | <1%            | <1%           | <1%            | 1183 |
| Starry sturgeon | <i>Huso huso</i>                               | <1%            | <1%              | <1%            | <1%           | <1%            | 1183 |
| Starry sturgeon | <i>Polyodon spathula</i>                       | <1%            | <1%              | <1%            | <1%           | 1%             | 1183 |
| Striped catfish | <i>Coryphaena hippurus</i>                     | 1%             | 1%               | <1%            | <1%           | 2%             | 194  |
| Striped catfish | <i>Micropogonias furnieri</i>                  | 1%             | 1%               | <1%            | <1%           | 2%             | 194  |
| Striped catfish | <i>Nemipterus japonicus</i>                    | 1%             | 1%               | <1%            | <1%           | 2%             | 194  |
| Swordfish       | <i>Istiompax indica</i>                        | 1%             | <1%              | <1%            | <1%           | 1%             | 222  |
| Swordfish       | <i>Isurus oxyrinchus</i>                       | 5%             | 5%               | 4%             | 2%            | 7%             | 222  |
| Swordfish       | <i>Makaira nigricans</i>                       | 1%             | <1%              | <1%            | <1%           | 1%             | 222  |
| Swordfish       | <i>Prionace glauca</i>                         | 11%            | 11%              | 11%            | 7%            | 15%            | 222  |
| Swordfish       | <i>Thunnus obesus</i>                          | 9%             | 8%               | 8%             | 5%            | 12%            | 222  |
| Tilapia*        | <i>Pangasianodon hypophthalmus</i>             | 1%             | 1%               | 1%             | <1%           | 4%             | 69   |
| Tilapia*        | <i>Pangasianodon nr</i>                        | 1%             | 1%               | <1%            | <1%           | 4%             | 69   |
| Tuna*           | <i>Auxis rochei</i>                            | <1%            | <1%              | <1%            | <1%           | 1%             | 547  |
| Tuna*           | <i>Katsuwonus pelamis</i>                      | <1%            | <1%              | <1%            | <1%           | 1%             | 547  |
| Tuna*           | <i>Lepidocybium flavobrunneum</i>              | 3%             | 3%               | 3%             | 2%            | 5%             | 547  |

| Expected             | Substitute                     | Posterior Mean | Posterior Median | Posterior Mode | Lower 95% HDI | Higher 95% HDI | n   |
|----------------------|--------------------------------|----------------|------------------|----------------|---------------|----------------|-----|
| Tuna*                | <i>Oreochromis mossambicus</i> | <1%            | <1%              | <1%            | <1%           | 1%             | 547 |
| Tuna*                | <i>Salmo salar</i>             | 1%             | 1%               | <1%            | <1%           | 1%             | 547 |
| Tuna*                | <i>Seriola lalandi</i>         | 1%             | 1%               | <1%            | <1%           | 1%             | 547 |
| Tuna*                | <i>Seriola quinqueradiata</i>  | <1%            | <1%              | <1%            | <1%           | 1%             | 547 |
| Tuna*                | <i>Seriola zonata</i>          | <1%            | <1%              | <1%            | <1%           | 1%             | 547 |
| Whiteleg shrimp      | <i>Parapenaeopsis nr</i>       | 1%             | 1%               | <1%            | <1%           | 3%             | 111 |
| Whiteleg shrimp      | <i>Penaeus monodon</i>         | 5%             | 5%               | 4%             | 1%            | 9%             | 111 |
| Whiteleg shrimp      | <i>Xystreureys rasile</i>      | 1%             | 1%               | <1%            | <1%           | 3%             | 111 |
| Yellowfin tuna       | <i>Euthynnus alletteratus</i>  | <1%            | <1%              | <1%            | <1%           | 1%             | 392 |
| Yellowfin tuna       | <i>Katsuwonus pelamis</i>      | 1%             | 1%               | <1%            | <1%           | 1%             | 392 |
| Yellowfin tuna       | <i>Sarda sarda</i>             | <1%            | <1%              | <1%            | <1%           | 1%             | 392 |
| Yellowfin tuna       | <i>Seriola quinqueradiata</i>  | <1%            | <1%              | <1%            | <1%           | 1%             | 392 |
| Yellowfin tuna       | <i>Thunnus alalunga</i>        | 1%             | 1%               | 1%             | <1%           | 3%             | 392 |
| Yellowfin tuna       | <i>Thunnus atlanticus</i>      | <1%            | <1%              | <1%            | <1%           | 1%             | 392 |
| Yellowfin tuna       | <i>Thunnus obesus</i>          | 11%            | 11%              | 11%            | 8%            | 14%            | 392 |
| Yellowfin tuna       | <i>Thunnus thynnus</i>         | 2%             | 2%               | 2%             | 1%            | 4%             | 392 |
| Yellowtail amberjack | <i>Seriola quinqueradiata</i>  | 74%            | 75%              | 75%            | 64%           | 84%            | 76  |

**Table SI-2.** Diagnostics for expected-substitute pair mislabeling rate estimates. Effective sample size (ESS), Markov chain standard error (MCSE) and the Gelman-Rubin shrink reduction factor (Shrink factor) for the  $\alpha$  estimates for each pair. Diagnostics indicate converged chains (i.e., Shrink Factor <1.1), ESS > 10,000, and MCSE as a % of the standard deviation <5% for all factors. Common names correspond to Fishbase [2] and Sealifebase [2]. Products with an \* represent more than one species.

| <b>Expected</b>       | <b>Substitute</b>                  | <b>ESS</b> | <b>MCSE</b> | <b>Shrink factor</b> |
|-----------------------|------------------------------------|------------|-------------|----------------------|
| Albacore              | <i>Katsuwonus pelamis</i>          | 604,974    | 0.4         | 1.000                |
| Albacore              | <i>Lepidocybium flavobrunneum</i>  | 651,635    | 0.4         | 1.000                |
| Albacore              | <i>Thunnus albacares</i>           | 629,973    | 0.4         | 1.000                |
| Albacore              | <i>Thunnus obesus</i>              | 625,857    | 0.4         | 1.000                |
| Albacore              | <i>Thunnus thynnus</i>             | 638,760    | 0.4         | 1.000                |
| Amur sturgeon         | <i>Huso dauricus</i>               | 614,346    | 0.4         | 1.000                |
| Anchovy*              | <i>Engraulis encrasicolus</i>      | 627,932    | 0.4         | 1.000                |
| Angler*               | <i>Lophius litulon</i>             | 609,959    | 0.4         | 1.000                |
| Angler*               | <i>Lophius vomerinus</i>           | 618,636    | 0.4         | 1.000                |
| Angler*               | <i>Protonibea diacanthus</i>       | 627,364    | 0.4         | 1.000                |
| Atlantic bluefin tuna | <i>Thunnus alalunga</i>            | 632,255    | 0.4         | 1.000                |
| Atlantic bluefin tuna | <i>Thunnus albacares</i>           | 625,030    | 0.4         | 1.000                |
| Atlantic bluefin tuna | <i>Thunnus atlanticus</i>          | 630,264    | 0.4         | 1.000                |
| Atlantic bluefin tuna | <i>Thunnus obesus</i>              | 619,793    | 0.4         | 1.000                |
| Atlantic cod          | <i>Brosme brosme</i>               | 635,320    | 0.4         | 1.000                |
| Atlantic cod          | <i>Gadus chalcogrammus</i>         | 627,504    | 0.4         | 1.000                |
| Atlantic cod          | <i>Gadus*cephalus</i>              | 616,008    | 0.4         | 1.000                |
| Atlantic cod          | <i>Melanogrammus aeglefinus</i>    | 595,508    | 0.4         | 1.000                |
| Atlantic cod          | <i>Merlangius merlangus</i>        | 619,410    | 0.4         | 1.000                |
| Atlantic cod          | <i>Merluccius nr</i>               | 623,213    | 0.4         | 1.000                |
| Atlantic cod          | <i>Molva dypterygia</i>            | 658,255    | 0.4         | 1.000                |
| Atlantic cod          | <i>Molva molva</i>                 | 634,717    | 0.4         | 1.000                |
| Atlantic cod          | <i>Pangasianodon hypophthalmus</i> | 600,698    | 0.4         | 1.000                |

| <b>Expected</b> | <b>Substitute</b>                                 | <b>ESS</b> | <b>MCSE</b> | <b>Shrink factor</b> |
|-----------------|---------------------------------------------------|------------|-------------|----------------------|
| Atlantic cod    | <i>Perca flavescens</i>                           | 640,742    | 0.4         | 1.000                |
| Atlantic cod    | <i>Pollachius pollachius</i>                      | 612,982    | 0.4         | 1.000                |
| Atlantic cod    | <i>Pollachius virens</i>                          | 622,447    | 0.4         | 1.000                |
| Atlantic cod    | <i>Ruvettus pretiosus</i>                         | 639,077    | 0.4         | 1.000                |
| Atlantic salmon | <i>Oncorhynchus keta</i>                          | 633,893    | 0.4         | 1.000                |
| Atlantic salmon | <i>Oncorhynchus mykiss</i>                        | 626,611    | 0.4         | 1.000                |
| Atlantic salmon | <i>Oncorhynchus nerka</i>                         | 649,063    | 0.4         | 1.000                |
| Atlantic salmon | <i>Salmo trutta</i>                               | 633,790    | 0.4         | 1.000                |
| Barramundi      | <i>Lates niloticus</i>                            | 613,034    | 0.4         | 1.000                |
| Barramundi      | <i>Lates nr</i>                                   | 607,074    | 0.4         | 1.000                |
| Barramundi      | <i>Serirolella brama</i>                          | 636,720    | 0.4         | 1.000                |
| Beluga          | <i>Acipenser baerii</i>                           | 639,415    | 0.4         | 1.000                |
| Beluga          | <i>Acipenser baerii x naccarii<br/>x persicus</i> | 625,196    | 0.4         | 1.000                |
| Beluga          | <i>Acipenser gueldenstaedtii</i>                  | 609,098    | 0.4         | 1.000                |
| Beluga          | <i>Acipenser gueldenstaedtii x<br/>naccarii</i>   | 614,922    | 0.4         | 1.000                |
| Beluga          | <i>Acipenser persicus</i>                         | 644,383    | 0.4         | 1.000                |
| Beluga          | <i>Acipenser sinensis</i>                         | 635,218    | 0.4         | 1.000                |
| Beluga          | <i>Acipenser stellatus</i>                        | 609,765    | 0.4         | 1.000                |
| Beluga          | <i>Acipenser transmontanus</i>                    | 637,686    | 0.4         | 1.000                |
| Beluga          | <i>Huso dauricus</i>                              | 644,302    | 0.4         | 1.000                |
| Blue crab       | <i>Callinectes bellicosus</i>                     | 628,757    | 0.4         | 1.000                |
| Blue crab       | <i>Charybdis nr</i>                               | 645,025    | 0.4         | 1.000                |
| Blue crab       | <i>Portunus nr</i>                                | 635,903    | 0.4         | 1.000                |
| Blue crab       | <i>Portunus pelagicus</i>                         | 622,913    | 0.4         | 1.000                |
| Blue crab       | <i>Portunus pseudoargentatus</i>                  | 622,992    | 0.4         | 1.000                |
| Blue crab       | <i>Portunus sanguinolentus</i>                    | 662,358    | 0.4         | 1.000                |
| Blue crab       | <i>Portunus trituberculatus</i>                   | 625,402    | 0.4         | 1.000                |
| Chinook salmon  | <i>Oncorhynchus keta</i>                          | 612,000    | 0.4         | 1.000                |
| Chinook salmon  | <i>Oncorhynchus kisutch</i>                       | 638,862    | 0.4         | 1.000                |

| <b>Expected</b> | <b>Substitute</b>                   | <b>ESS</b> | <b>MCSE</b> | <b>Shrink factor</b> |
|-----------------|-------------------------------------|------------|-------------|----------------------|
| Chinook salmon  | <i>Salmo salar</i>                  | 615,442    | 0.4         | 1.000                |
| Cod*            | <i>Albatrossia pectoralis</i>       | 632,044    | 0.4         | 1.000                |
| Cod*            | <i>Anarhichas minor</i>             | 646,508    | 0.4         | 1.000                |
| Cod*            | <i>Anoplopoma fimbria</i>           | 611,717    | 0.4         | 1.000                |
| Cod*            | <i>Argentina silus</i>              | 627,959    | 0.4         | 1.000                |
| Cod*            | <i>Atheresthes evermanni</i>        | 656,415    | 0.4         | 1.000                |
| Cod*            | <i>Atheresthes stomias</i>          | 630,544    | 0.4         | 1.000                |
| Cod*            | <i>Dissostichus eleginoides</i>     | 614,203    | 0.4         | 1.000                |
| Cod*            | <i>Gadus chalcogrammus</i>          | 637,083    | 0.4         | 1.000                |
| Cod*            | <i>Lagocephalus spadiceus</i>       | 621,730    | 0.4         | 1.000                |
| Cod*            | <i>Lagocephalus wheeleri</i>        | 631,184    | 0.4         | 1.000                |
| Cod*            | <i>Lates niloticus</i>              | 617,780    | 0.4         | 1.000                |
| Cod*            | <i>Macrourus carinatus</i>          | 622,233    | 0.4         | 1.000                |
| Cod*            | <i>Melanogrammus aeglefinus</i>     | 620,014    | 0.4         | 1.000                |
| Cod*            | <i>Merluccius angustimanus</i>      | 627,712    | 0.4         | 1.000                |
| Cod*            | <i>Merluccius capensis</i>          | 637,487    | 0.4         | 1.000                |
| Cod*            | <i>Merluccius hubbsi</i>            | 609,666    | 0.4         | 1.000                |
| Cod*            | <i>Merluccius merluccius</i>        | 623,645    | 0.4         | 1.000                |
| Cod*            | <i>Merluccius paradoxus</i>         | 614,560    | 0.4         | 1.000                |
| Cod*            | <i>Merluccius productus</i>         | 644,420    | 0.4         | 1.000                |
| Cod*            | <i>Micromesistius australis</i>     | 632,384    | 0.4         | 1.000                |
| Cod*            | <i>Molva dypterygia</i>             | 630,589    | 0.4         | 1.000                |
| Cod*            | <i>Molva molva</i>                  | 629,223    | 0.4         | 1.000                |
| Cod*            | <i>Oreochromis nr</i>               | 643,975    | 0.4         | 1.000                |
| Cod*            | <i>Pangasianodon hypophthalmus</i>  | 635,059    | 0.4         | 1.000                |
| Cod*            | <i>Pollachius pollachius</i>        | 624,391    | 0.4         | 1.000                |
| Cod*            | <i>Pollachius virens</i>            | 634,100    | 0.4         | 1.000                |
| Cod*            | <i>Reinhardtius hippoglossoides</i> | 651,458    | 0.4         | 1.000                |
| Cod*            | <i>Ruvettus pretiosus</i>           | 629,912    | 0.4         | 1.000                |

| <b>Expected</b>       | <b>Substitute</b>                              | <b>ESS</b> | <b>MCSE</b> | <b>Shrink factor</b> |
|-----------------------|------------------------------------------------|------------|-------------|----------------------|
| Common dolphinfish    | <i>Argyrozona argyrozona</i>                   | 623,829    | 0.4         | 1.000                |
| Common dolphinfish    | <i>Brachyplatystoma platynemum</i>             | 647,530    | 0.4         | 1.000                |
| Common dolphinfish    | <i>Seriola lalandi</i>                         | 628,307    | 0.4         | 1.000                |
| Danube sturgeon       | <i>Acipenser baerii</i>                        | 637,830    | 0.4         | 1.000                |
| Danube sturgeon       | <i>Acipenser baerii x naccaraii x persicus</i> | 605,952    | 0.4         | 1.000                |
| Danube sturgeon       | <i>Acipenser nudiventris</i>                   | 623,625    | 0.4         | 1.000                |
| Danube sturgeon       | <i>Acipenser persicus</i>                      | 629,512    | 0.4         | 1.000                |
| Danube sturgeon       | <i>Acipenser schrenckii</i>                    | 619,298    | 0.4         | 1.000                |
| Danube sturgeon       | <i>Acipenser stellatus</i>                     | 610,092    | 0.4         | 1.000                |
| Danube sturgeon       | <i>Acipenser transmontanus</i>                 | 640,972    | 0.4         | 1.000                |
| Danube sturgeon       | <i>Huso dauricus</i>                           | 637,722    | 0.4         | 1.000                |
| Danube sturgeon       | <i>Huso huso</i>                               | 617,145    | 0.4         | 1.000                |
| Flounder*             | <i>Atheresthes stomias</i>                     | 609,590    | 0.4         | 1.000                |
| Flounder*             | <i>Cynoscion guatucupa</i>                     | 618,590    | 0.4         | 1.000                |
| Flounder*             | <i>Isopisthus parvipinnis</i>                  | 637,935    | 0.4         | 1.000                |
| Flounder*             | <i>Micropogonias furnieri</i>                  | 646,736    | 0.4         | 1.000                |
| Flounder*             | <i>Pangasianodon hypophthalmus</i>             | 627,748    | 0.4         | 1.000                |
| Flounder*             | <i>Pangasianodon nr</i>                        | 636,811    | 0.4         | 1.000                |
| Flounder*             | <i>Paralichthys patagonicus</i>                | 619,612    | 0.4         | 1.000                |
| Fringebarbel sturgeon | <i>Acipenser stellatus</i>                     | 632,619    | 0.4         | 1.000                |
| Fringebarbel sturgeon | <i>Huso huso</i>                               | 625,040    | 0.4         | 1.000                |
| Grouper*              | <i>Acanthistius brasilianus</i>                | 631,120    | 0.4         | 1.000                |
| Grouper*              | <i>Aprion virescens</i>                        | 639,407    | 0.4         | 1.000                |
| Grouper*              | <i>Brotula barbata</i>                         | 617,729    | 0.4         | 1.000                |
| Grouper*              | <i>Caulolatilus nr</i>                         | 640,586    | 0.4         | 1.000                |
| Grouper*              | <i>Chelidonichthys capensis</i>                | 653,528    | 0.4         | 1.000                |

| <b>Expected</b>  | <b>Substitute</b>                  | <b>ESS</b> | <b>MCSE</b> | <b>Shrink factor</b> |
|------------------|------------------------------------|------------|-------------|----------------------|
| Grouper*         | <i>Cynoscion albus</i>             | 626,003    | 0.4         | 1.000                |
| Grouper*         | <i>Cynoscion guatucupa</i>         | 647,566    | 0.4         | 1.000                |
| Grouper*         | <i>Cynoscion virescens</i>         | 650,222    | 0.4         | 1.000                |
| Grouper*         | <i>Gadus chalcogrammus</i>         | 643,003    | 0.4         | 1.000                |
| Grouper*         | <i>Hyporthodus nr</i>              | 627,223    | 0.4         | 1.000                |
| Grouper*         | <i>Lobotes surinamensis</i>        | 641,673    | 0.4         | 1.000                |
| Grouper*         | <i>Merluccius merluccius</i>       | 649,107    | 0.4         | 1.000                |
| Grouper*         | <i>Micropogonias furnieri</i>      | 657,483    | 0.4         | 1.000                |
| Grouper*         | <i>Oreochromis niloticus</i>       | 631,787    | 0.4         | 1.000                |
| Grouper*         | <i>Oreochromis nr</i>              | 658,557    | 0.4         | 1.000                |
| Grouper*         | <i>Pangasianodon hypophthalmus</i> | 637,404    | 0.4         | 1.000                |
| Grouper*         | <i>Pangasius bocourti</i>          | 645,830    | 0.4         | 1.000                |
| Grouper*         | <i>Scarus nr</i>                   | 666,977    | 0.4         | 1.000                |
| Grouper*         | <i>Scomberomorus cavalla</i>       | 649,970    | 0.4         | 1.000                |
| Haddock          | <i>Gadus*cephalus</i>              | 622,886    | 0.4         | 1.000                |
| Haddock          | <i>Gadus morhua</i>                | 624,397    | 0.4         | 1.000                |
| Haddock          | <i>Gadus nr</i>                    | 633,823    | 0.4         | 1.000                |
| Haddock          | <i>Lepidocybium flavobrunneum</i>  | 638,279    | 0.4         | 1.000                |
| Haddock          | <i>Merlangius merlangus</i>        | 647,843    | 0.4         | 1.000                |
| Haddock          | <i>Pollachius pollachius</i>       | 638,367    | 0.4         | 1.000                |
| Haddock          | <i>Pollachius virens</i>           | 625,015    | 0.4         | 1.000                |
| Humphead snapper | <i>Lutjanus erythropterus</i>      | 617,591    | 0.4         | 1.000                |
| Humphead snapper | <i>Lutjanus malabaricus</i>        | 597,735    | 0.4         | 1.000                |
| Humphead snapper | <i>Lutjanus nr</i>                 | 651,535    | 0.4         | 1.000                |
| Humphead snapper | <i>Lutjanus sebae</i>              | 630,145    | 0.4         | 1.000                |
| Kaluga           | <i>Acipenser gueldenstaedtii</i>   | 634,267    | 0.4         | 1.000                |
| Kaluga           | <i>Acipenser schrenckii</i>        | 626,241    | 0.4         | 1.000                |

| <b>Expected</b>      | <b>Substitute</b>                  | <b>ESS</b> | <b>MCSE</b> | <b>Shrink factor</b> |
|----------------------|------------------------------------|------------|-------------|----------------------|
| Northern red snapper | <i>Gadus morhua</i>                | 630,075    | 0.4         | 1.000                |
| Northern red snapper | <i>Lates niloticus</i>             | 657,332    | 0.4         | 1.000                |
| Northern red snapper | <i>Lutjanus analis</i>             | 650,991    | 0.4         | 1.000                |
| Northern red snapper | <i>Lutjanus erythropterus</i>      | 639,239    | 0.4         | 1.000                |
| Northern red snapper | <i>Lutjanus griseus</i>            | 603,397    | 0.4         | 1.000                |
| Northern red snapper | <i>Lutjanus malabaricus</i>        | 620,819    | 0.4         | 1.000                |
| Northern red snapper | <i>Lutjanus novemfasiatus</i>      | 639,114    | 0.4         | 1.000                |
| Northern red snapper | <i>Lutjanus sanguineus</i>         | 643,542    | 0.4         | 1.000                |
| Northern red snapper | <i>Lutjanus synagris</i>           | 611,302    | 0.4         | 1.000                |
| Northern red snapper | <i>Lutjanus vivanus</i>            | 627,832    | 0.4         | 1.000                |
| Northern red snapper | <i>Ocyurus chrysurus</i>           | 648,581    | 0.4         | 1.000                |
| Northern red snapper | <i>Oreochromis nr</i>              | 625,257    | 0.4         | 1.000                |
| Northern red snapper | <i>Pagrus major</i>                | 648,568    | 0.4         | 1.000                |
| Northern red snapper | <i>Pangasianodon hypophthalmus</i> | 631,884    | 0.4         | 1.000                |
| Northern red snapper | <i>Pinjalo lewisi</i>              | 625,036    | 0.4         | 1.000                |
| Northern red snapper | <i>Pristipomoides sieboldii</i>    | 631,573    | 0.4         | 1.000                |
| Northern red snapper | <i>Rhomboplites aurorubens</i>     | 612,277    | 0.4         | 1.000                |
| Northern red snapper | <i>Sebastes fasciatus</i>          | 642,730    | 0.4         | 1.000                |
| Northern red snapper | <i>Sebastes nr</i>                 | 631,595    | 0.4         | 1.000                |



| <b>Expected</b>      | <b>Substitute</b>               | <b>ESS</b> | <b>MCSE</b> | <b>Shrink factor</b> |
|----------------------|---------------------------------|------------|-------------|----------------------|
| Pacific bluefin tuna | <i>Thunnus albacares</i>        | 589,796    | 0.4         | 1.000                |
| Pacific bluefin tuna | <i>Thunnus obesus</i>           | 598,775    | 0.4         | 1.000                |
| Pacific bluefin tuna | <i>Xiphias gladius</i>          | 635,436    | 0.4         | 1.000                |
| Pacific cod          | <i>Gadus morhua</i>             | 625,960    | 0.4         | 1.000                |
| Pacific cod          | <i>Liparis nr</i>               | 615,977    | 0.4         | 1.000                |
| Pacific cod          | <i>Melanogrammus aeglefinus</i> | 626,688    | 0.4         | 1.000                |
| Pacific salmon*      | <i>Oncorhynchus mykiss</i>      | 633,844    | 0.4         | 1.000                |
| Pacific salmon*      | <i>Salmo salar</i>              | 601,939    | 0.4         | 1.000                |
| Pacific snapper*     | <i>Oreochromis nr</i>           | 627,060    | 0.4         | 1.000                |
| Salmon*              | <i>Cynoscion guatucupa</i>      | 654,136    | 0.4         | 1.000                |
| Salmon*              | <i>Micropogonias furnieri</i>   | 647,156    | 0.4         | 1.000                |
| Salmon*              | <i>Oncorhynchus mykiss</i>      | 619,672    | 0.4         | 1.000                |
| Salmon*              | <i>Prionace glauca</i>          | 642,766    | 0.4         | 1.000                |
| Salmon*              | <i>Salmo trutta</i>             | 650,003    | 0.4         | 1.000                |
| Salmon*              | <i>Seriola zonata</i>           | 643,108    | 0.4         | 1.000                |
| Salmon*              | <i>Thunnus alalunga</i>         | 638,441    | 0.4         | 1.000                |
| Sardine*             | <i>Brevoortia aurea</i>         | 627,805    | 0.4         | 1.000                |
| Sardine*             | <i>Centengraulis edentulus</i>  | 610,138    | 0.4         | 1.000                |
| Sardine*             | <i>Clupea harengus</i>          | 625,059    | 0.4         | 1.000                |
| Sardine*             | <i>Rastrelliger faughni</i>     | 646,329    | 0.4         | 1.000                |
| Sardine*             | <i>Scomber japonicus</i>        | 641,773    | 0.4         | 1.000                |
| Sardine*             | <i>Trachurus lathami</i>        | 628,257    | 0.4         | 1.000                |
| Seabass*             | <i>Lateolabrax japonicus</i>    | 628,877    | 0.4         | 1.000                |
| Seabass*             | <i>Morone chrysops</i>          | 638,820    | 0.4         | 1.000                |
| Seabass*             | <i>Morone saxatilis</i>         | 643,728    | 0.4         | 1.000                |
| Seabass*             | <i>Oreochromis niloticus</i>    | 654,975    | 0.4         | 1.000                |
| Seabass*             | <i>Pagrus major</i>             | 628,406    | 0.4         | 1.000                |
| Seabass*             | <i>Paralichthys dentatus</i>    | 649,173    | 0.4         | 1.000                |

| <b>Expected</b> | <b>Substitute</b>                                 | <b>ESS</b> | <b>MCSE</b> | <b>Shrink factor</b> |
|-----------------|---------------------------------------------------|------------|-------------|----------------------|
| Seabass*        | <i>Sciaenops ocellatus</i>                        | 647,636    | 0.4         | 1.000                |
| Seabass*        | <i>Sparus aurata</i>                              | 634,594    | 0.4         | 1.000                |
| Shrimp*         | <i>Litopenaeus vannamei</i>                       | 642,882    | 0.4         | 1.000                |
| Shrimp*         | <i>Pleoticus robustus</i>                         | 623,891    | 0.4         | 1.000                |
| Snapper*        | <i>Lutjanus argentimaculatus</i>                  | 623,864    | 0.4         | 1.000                |
| Snapper*        | <i>Lutjanus kasmira</i>                           | 636,416    | 0.4         | 1.000                |
| Snapper*        | <i>Lutjanus sanguineus</i>                        | 649,620    | 0.4         | 1.000                |
| Snapper*        | <i>Oreochromis aureus</i>                         | 638,884    | 0.4         | 1.000                |
| Snapper*        | <i>Oreochromis mossambicus</i>                    | 624,786    | 0.4         | 1.000                |
| Snapper*        | <i>Oreochromis niloticus</i>                      | 630,445    | 0.4         | 1.000                |
| Snapper*        | <i>Oreochromis nr</i>                             | 636,995    | 0.4         | 1.000                |
| Snapper*        | <i>Oreochromis urolepis</i>                       | 655,432    | 0.4         | 1.000                |
| Snapper*        | <i>Pagrus major</i>                               | 662,327    | 0.4         | 1.000                |
| Snapper*        | <i>Sebastes alutus</i>                            | 632,270    | 0.4         | 1.000                |
| Snapper*        | <i>Sebastes babcocki</i>                          | 665,227    | 0.4         | 1.000                |
| Snapper*        | <i>Sebastes entomelas</i>                         | 630,875    | 0.4         | 1.000                |
| Snapper*        | <i>Sebastes flavidus</i>                          | 643,771    | 0.4         | 1.000                |
| Snapper*        | <i>Seriola quinqueradiata</i>                     | 648,597    | 0.4         | 1.000                |
| Snapper*        | <i>Sparus aurata</i>                              | 638,635    | 0.4         | 1.000                |
| Sockeye salmon  | <i>Oncorhynchus kisutch</i>                       | 632,192    | 0.4         | 1.000                |
| Squid*          | <i>Doryteuthis gahi</i>                           | 605,700    | 0.4         | 1.000                |
| Squid*          | <i>Lagocephalus spadiceus</i>                     | 630,402    | 0.4         | 1.000                |
| Squid*          | <i>Sepia pharaonis</i>                            | 614,290    | 0.4         | 1.000                |
| Squid*          | <i>Upeneus japonicus</i>                          | 629,960    | 0.4         | 1.000                |
| Squid*          | <i>Uroteuthis duvaucelii</i>                      | 613,937    | 0.4         | 1.000                |
| Starry sturgeon | <i>Acipenser baerii</i>                           | 614,292    | 0.4         | 1.000                |
| Starry sturgeon | <i>Acipenser baerii x naccarii<br/>x persicus</i> | 623,861    | 0.4         | 1.000                |
| Starry sturgeon | <i>Acipenser gueldenstaedtii</i>                  | 626,354    | 0.4         | 1.000                |
| Starry sturgeon | <i>Acipenser gueldenstaedtii x<br/>naccarii</i>   | 631,744    | 0.4         | 1.000                |

| <b>Expected</b> | <b>Substitute</b>                  | <b>ESS</b> | <b>MCSE</b> | <b>Shrink factor</b> |
|-----------------|------------------------------------|------------|-------------|----------------------|
| Starry sturgeon | <i>Acipenser nudiiventris</i>      | 620,015    | 0.4         | 1.000                |
| Starry sturgeon | <i>Acipenser persicus</i>          | 626,022    | 0.4         | 1.000                |
| Starry sturgeon | <i>Acipenser ruthenus</i>          | 635,761    | 0.4         | 1.000                |
| Starry sturgeon | <i>Huso dauricus</i>               | 619,253    | 0.4         | 1.000                |
| Starry sturgeon | <i>Huso huso</i>                   | 594,126    | 0.4         | 1.000                |
| Starry sturgeon | <i>Polyodon spathula</i>           | 628,556    | 0.4         | 1.000                |
| Striped catfish | <i>Coryphaena hippurus</i>         | 651,213    | 0.4         | 1.000                |
| Striped catfish | <i>Micropogonias furnieri</i>      | 655,506    | 0.4         | 1.000                |
| Striped catfish | <i>Nemipterus japonicus</i>        | 634,809    | 0.4         | 1.000                |
| Swordfish       | <i>Istiompax indica</i>            | 630,080    | 0.4         | 1.000                |
| Swordfish       | <i>Isurus oxyrinchus</i>           | 620,511    | 0.4         | 1.000                |
| Swordfish       | <i>Makaira nigricans</i>           | 657,479    | 0.4         | 1.000                |
| Swordfish       | <i>Prionace glauca</i>             | 629,522    | 0.4         | 1.000                |
| Swordfish       | <i>Thunnus obesus</i>              | 609,050    | 0.4         | 1.000                |
| Tilapia*        | <i>Pangasianodon hypophthalmus</i> | 646,412    | 0.4         | 1.000                |
| Tilapia*        | <i>Pangasianodon nr</i>            | 631,118    | 0.4         | 1.000                |
| Tuna*           | <i>Auxis rochei</i>                | 608,491    | 0.4         | 1.000                |
| Tuna*           | <i>Katsuwonus pelamis</i>          | 649,813    | 0.4         | 1.000                |
| Tuna*           | <i>Lepidocybium flavobrunneum</i>  | 630,804    | 0.4         | 1.000                |
| Tuna*           | <i>Oreochromis mossambicus</i>     | 627,047    | 0.4         | 1.000                |
| Tuna*           | <i>Salmo salar</i>                 | 633,087    | 0.4         | 1.000                |
| Tuna*           | <i>Seriola lalandi</i>             | 637,153    | 0.4         | 1.000                |
| Tuna*           | <i>Seriola quinqueradiata</i>      | 629,611    | 0.4         | 1.000                |
| Tuna*           | <i>Seriola zonata</i>              | 627,995    | 0.4         | 1.000                |
| Whiteleg shrimp | <i>Parapenaeopsis nr</i>           | 646,225    | 0.4         | 1.000                |
| Whiteleg shrimp | <i>Penaeus monodon</i>             | 630,460    | 0.4         | 1.000                |
| Whiteleg shrimp | <i>Xystreuryx rasile</i>           | 644,147    | 0.4         | 1.000                |
| Yellowfin tuna  | <i>Euthynnus alletteratus</i>      | 648,716    | 0.4         | 1.000                |
| Yellowfin tuna  | <i>Katsuwonus pelamis</i>          | 627,840    | 0.4         | 1.000                |

| <b>Expected</b>         | <b>Substitute</b>             | <b>ESS</b> | <b>MCSE</b> | <b>Shrink factor</b> |
|-------------------------|-------------------------------|------------|-------------|----------------------|
| Yellowfin tuna          | <i>Sarda sarda</i>            | 635,122    | 0.4         | 1.000                |
| Yellowfin tuna          | <i>Seriola quinqueradiata</i> | 643,166    | 0.4         | 1.000                |
| Yellowfin tuna          | <i>Thunnus alalunga</i>       | 636,225    | 0.4         | 1.000                |
| Yellowfin tuna          | <i>Thunnus atlanticus</i>     | 642,423    | 0.4         | 1.000                |
| Yellowfin tuna          | <i>Thunnus obesus</i>         | 616,969    | 0.4         | 1.000                |
| Yellowfin tuna          | <i>Thunnus thynnus</i>        | 632,906    | 0.4         | 1.000                |
| Yellowtail<br>amberjack | <i>Seriola quinqueradiata</i> | 588,426    | 0.4         | 1.000                |

**Table SI-3:** Bootstrapping Results for Seafood Watch Score Tests (*U.S. 50+ Pairs*)

|                                      | <b>Target Species</b> | <b>Other Species</b> | <b>Management Effectiveness</b> | <b>Habitat and Ecosystem</b> |
|--------------------------------------|-----------------------|----------------------|---------------------------------|------------------------------|
| Percentage point difference from 50% | -35.705***            | -35.795***           | -27.852***                      | -20.449**                    |
| P-value                              | 0.000                 | 0.000                | 0.000                           | 0.040                        |

N=39

Statistical significance levels: \* 10-percent, \*\* 5-percent, \*\*\* 1-percent

**Table SI-4:** Bootstrapping Results Examining Differences in Import Percentages for *U.S. 50+ Pairs*, *Global 50+ Pairs* and *Global 100+ Pairs* Datasets

|                                                | <b>US 50+</b> | <b>Global 50+</b> | <b>Global 100+</b> |
|------------------------------------------------|---------------|-------------------|--------------------|
| Average percentage-point difference in imports | 27.842**      | 30.88***          | 26.896***          |
| P-value                                        | .014          | 0.000             | 0.008              |
| Observations                                   | 144           | 217               | 167                |

Statistical significance levels: \* 10-percent, \*\* 5-percent, \*\*\* 1-percent

**Table SI-5:** Bootstrapping Results for Seafood Watch Score Tests: *Global 50+ Pairs*

|                                      | <b>Target Species</b> | <b>Other Species</b> | <b>Management Effectiveness</b> | <b>Habitat and Ecosystem</b> |
|--------------------------------------|-----------------------|----------------------|---------------------------------|------------------------------|
| Percentage point difference from 50% | -38.136***            | -28.845***           | -30.664***                      | -19.204**                    |
| P-value                              | 0.000                 | 0.000                | 0.000                           | .030                         |

N=55

Statistical significance levels: \* 10-percent, \*\* 5-percent, \*\*\* 1-percent

**Table SI-6:** Bootstrapping Results for Seafood Watch Score Tests: *Global 100+ Pairs*

|                                      | <b>Target Species</b> | <b>Other Species</b> | <b>Management Effectiveness</b> | <b>Habitat and Ecosystem</b> |
|--------------------------------------|-----------------------|----------------------|---------------------------------|------------------------------|
| Percentage point difference from 50% | -35.171***            | -22.058***           | -27.477***                      | -10.727                      |
| P-value                              | 0.000                 | 0.005                | 0.000                           | 0.416                        |

N=44

Statistical significance levels: \* 10-percent, \*\* 5-percent, \*\*\* 1-percent



**Table SI-7:** Bootstrapping Results Excluding Species Groups: *U.S. 50+ Pairs*

|                                                               | Import Percentages  | Seafood Watch Scores  |                       |                          |                       |
|---------------------------------------------------------------|---------------------|-----------------------|-----------------------|--------------------------|-----------------------|
|                                                               |                     | Target Species        | Other Species         | Management Effectiveness | Habitat and Ecosystem |
| Excluding Anchovy<br>Imports N = 143<br>SW Score N = 38       | 27.816**<br>(0.047) | -35.797***<br>(0.000) | -35.887***<br>(0.000) | -27.924***<br>(0.000)    | -20.501**<br>(0.039)  |
| Excluding Grouper<br>Imports N = 137<br>SW Score N = 47       | 27.864**<br>(0.046) | -35.739***<br>(0.000) | -35.877***<br>(0.000) | -27.927***<br>(0.000)    | -20.468**<br>(0.040)  |
| Excluding Haddock<br>Imports N = 138<br>SW Score N = 35       | 28.046**<br>(0.046) | -35.512***<br>(0.000) | -35.681***<br>(0.000) | -28.460***<br>(0.000)    | -20.043*<br>(0.054)   |
| Excluding Hake<br>macro<br>Imports N = 144<br>SW Score N = 39 | 27.842**<br>(0.046) | -35.705***<br>(0.000) | -35.795***<br>(0.000) | -27.852***<br>(0.000)    | -20.449**<br>(0.040)  |
| Excluding Octopus<br>Imports N = 144<br>SW Score N = 39       | 27.842**<br>(0.046) | -35.705***<br>(0.000) | -35.795***<br>(0.000) | -27.852***<br>(0.000)    | -20.449**<br>(0.040)  |
| Excluding Sardine<br>Imports N = 141<br>SW Score N = 38       | 28.372**<br>(0.042) | -36.416***<br>(0.000) | -36.506***<br>(0.000) | -27.498***<br>(0.000)    | -20.204**<br>(0.046)  |
| Excluding Swordfish<br>Imports N = 141<br>SW Score N = 36     | 28.924**<br>(0.038) | -34.879***<br>(0.000) | -34.974***<br>(0.000) | -29.650***<br>(0.000)    | -23.476***<br>(0.002) |
| Excluding Tuna<br>Imports N = 130<br>SW Score N = 31          | 30.340**<br>(0.034) | -36.378***<br>(0.000) | -43.438***<br>(0.000) | -35.960***<br>(0.000)    | -28.229***<br>(0.000) |

P-values are in parentheses.

Statistical significance levels: \* 10-percent, \*\* 5-percent, \*\*\* 1-percent

## References

1. FAO Fisheries and Aquaculture Department. 2016. *FishStatJ - Software for Fishery Statistical Time Series*. 2016.
2. Froese, R., and D. Pauly. 2018. *Fishbase. World Wide Web Electronic Publication*. Version 02/2018. <http://www.fishbase.org>
3. Palomares, M.L.D., and D. Pauly. *Sealifebase*. World Wide Web electronic publication. Version 02/2018. [www.sealifebase.org](http://www.sealifebase.org).
4. Luque, G.M., and C.J. Donlan. 2019. *The Characterization of Seafood Mislabeling: A Global Meta-Analysis*. *Biological Conservation*. **236**: p. 556-570.
5. Monterey Bay Aquarium. 2018. *Developing Seafood Watch Recommendations*.
6. Gelman, A., A. Jakulin, M.G. Pittau, and Y.-S. Su, *A Weakly Informative Default Prior Distribution for Logistic and Other Regression Models*. *The Annals of Applied Statistics*, 2008. **2**(4): p. 1360-1383.
7. Kruschke, J. 2014. *Doing Bayesian Data Analysis: A Tutorial with R, Jags, and Stan*. Academic Press.
8. Breheny, P., *MCMC Diagnostics*. nd. Bst 701, Bayesian Modeling in Biostatistics. Available: <http://web.as.uky.edu/statistics/users/pbreheny/701/s13/notes/3-5.pdf>. Last accessed January 10, 2020.
